# Supplementary material
Source: PubMed Central journal article supplement (PMC1088381)

vehicle

oxazolone

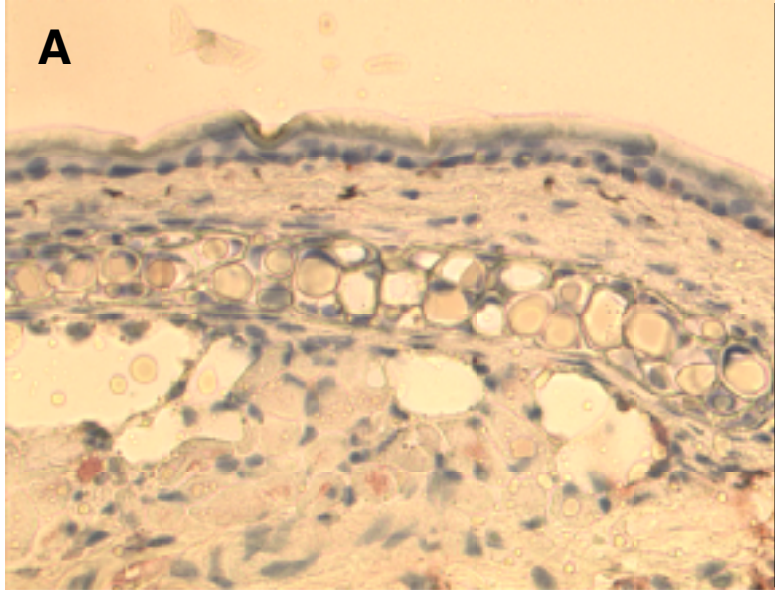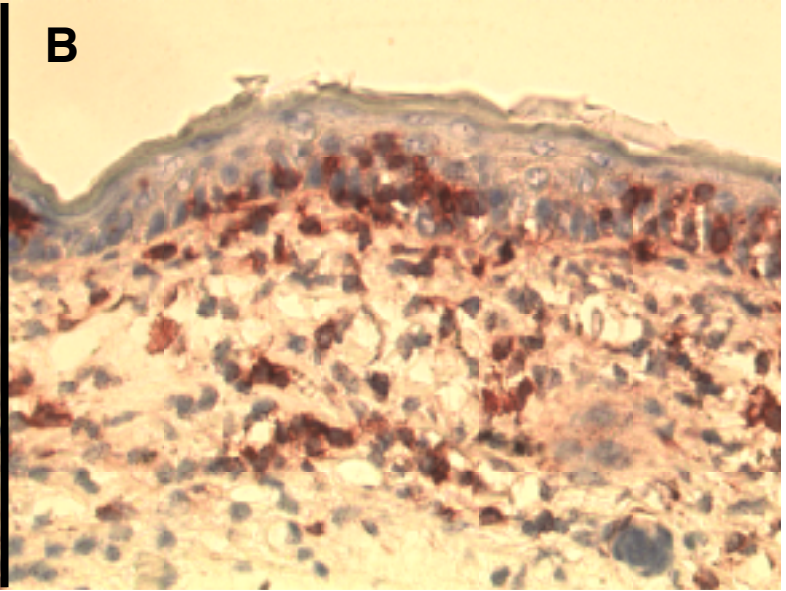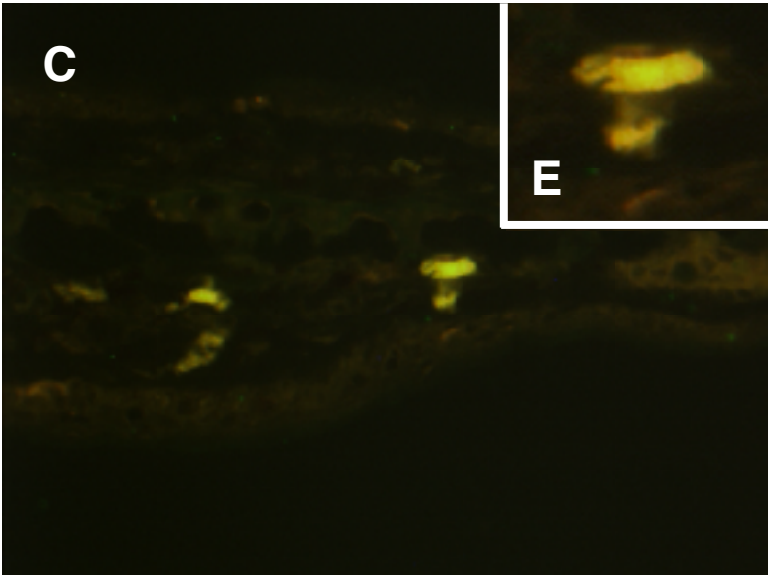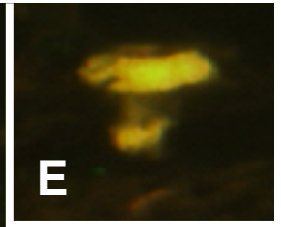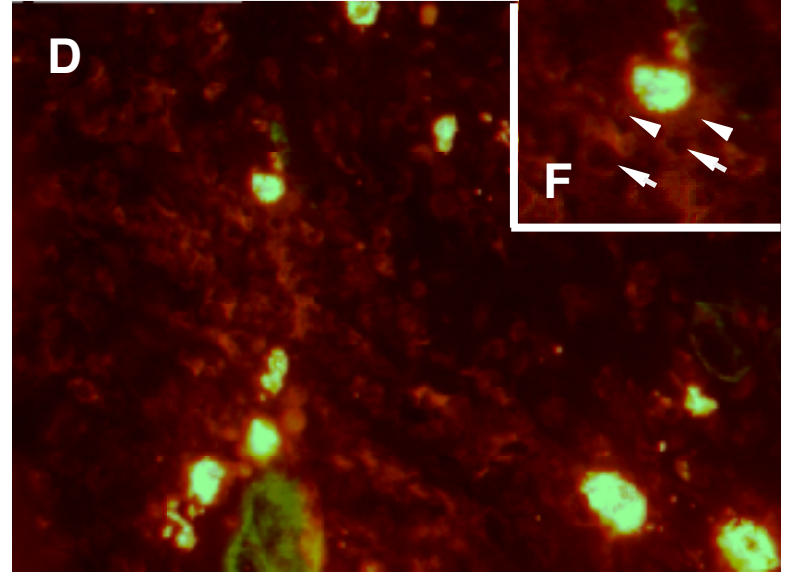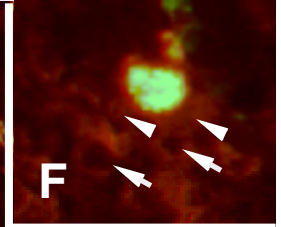

Supplement: pnas_102_18_6467__1.pdf [file pnas_102_18_6467__1.pdf]

**A**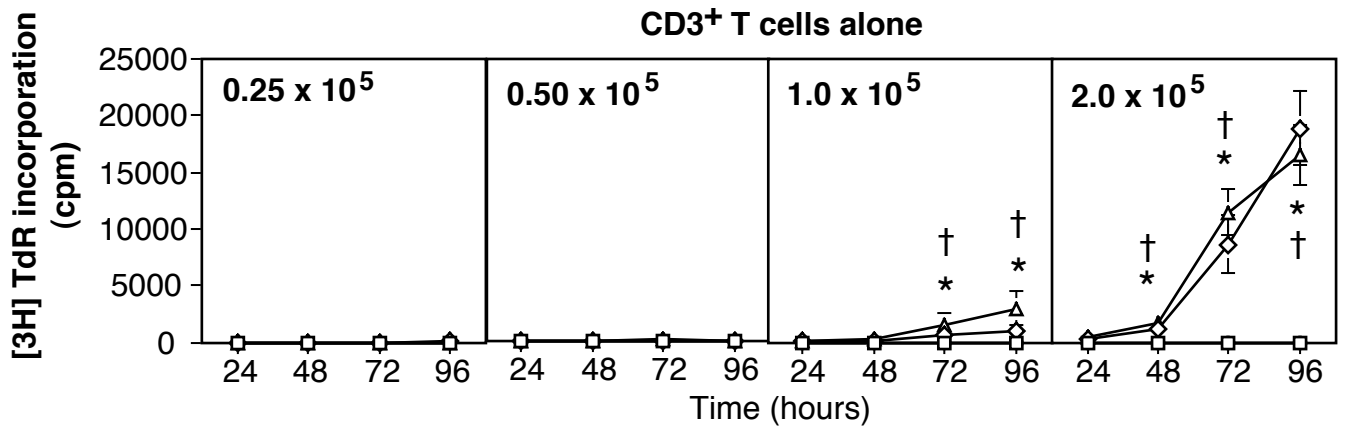**B**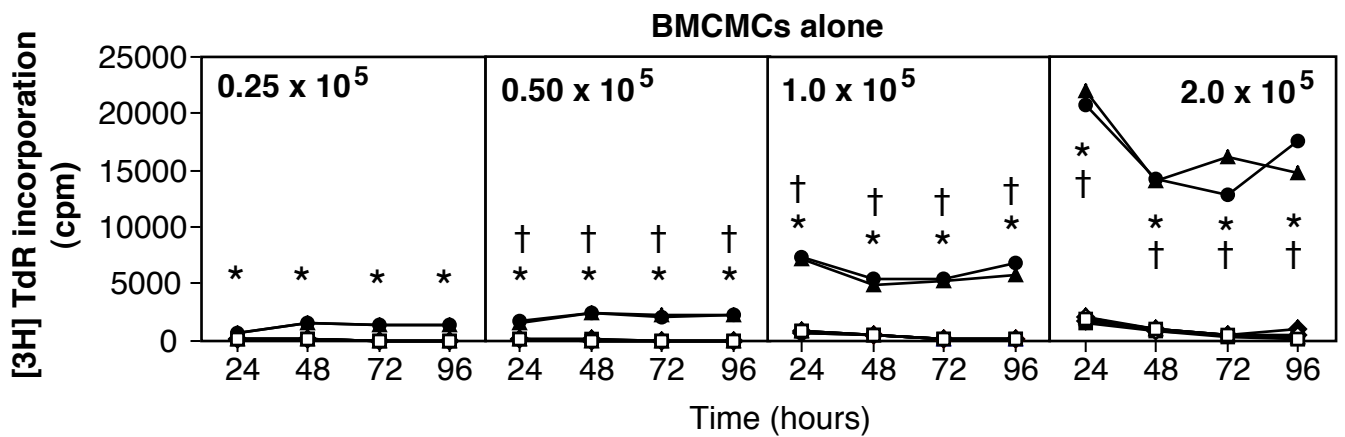**C**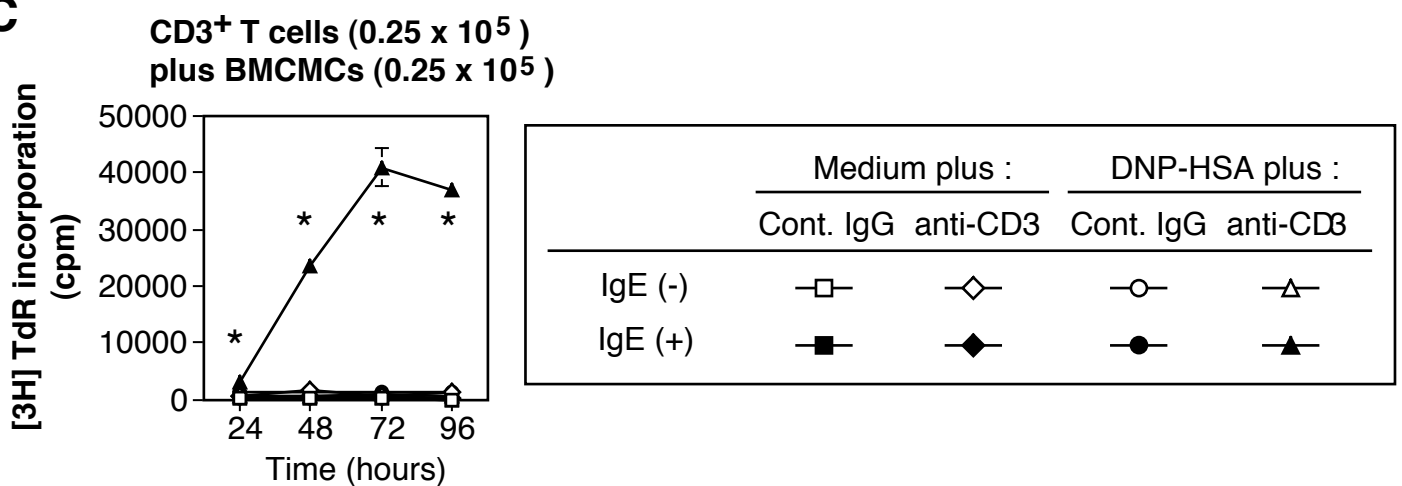

Supplement: pnas_102_18_6467__2.pdf [file pnas_102_18_6467__2.pdf]

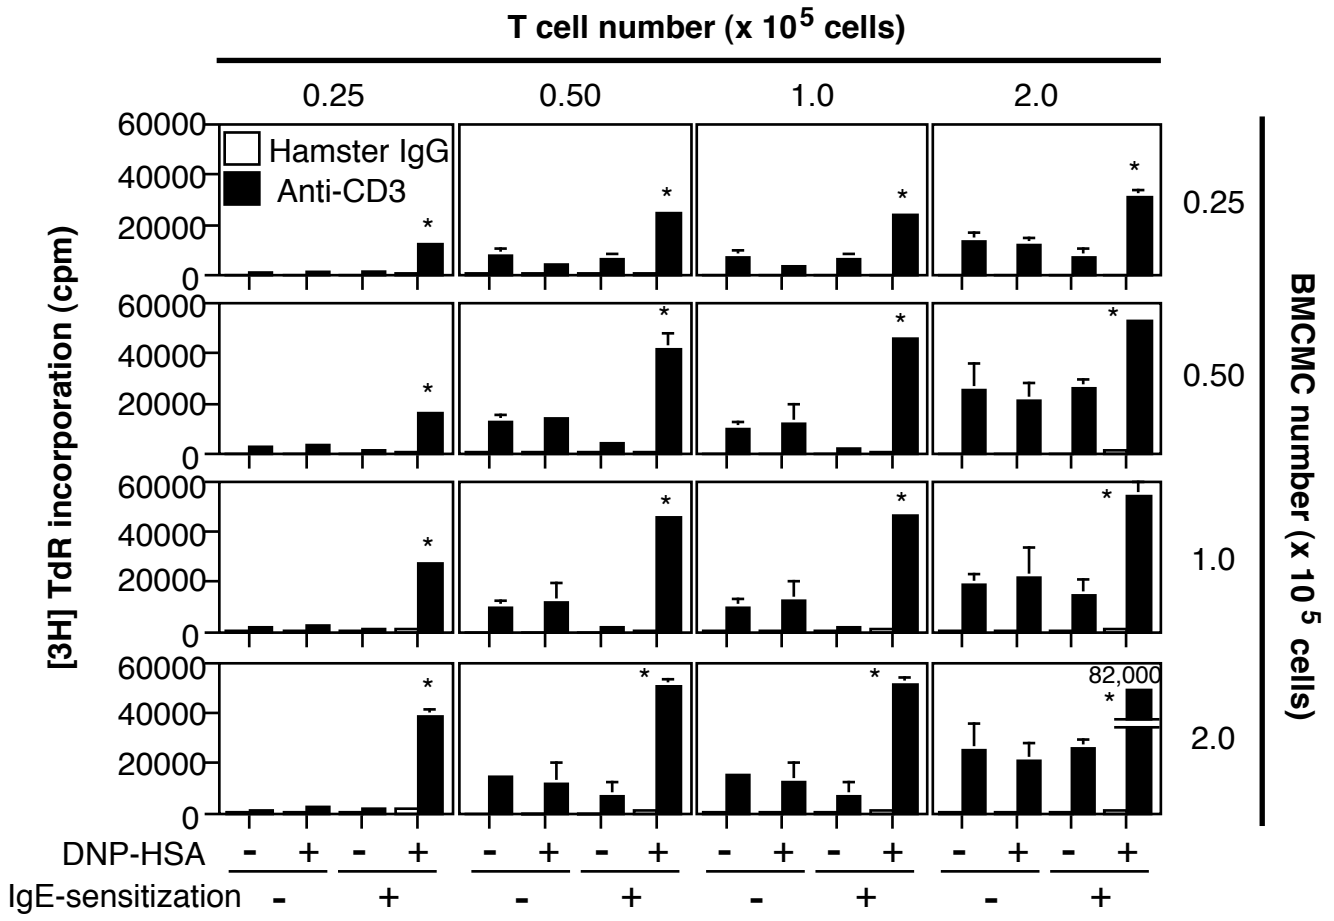

Supplement: pnas_102_18_6467__3.pdf [file pnas_102_18_6467__3.pdf]

**A**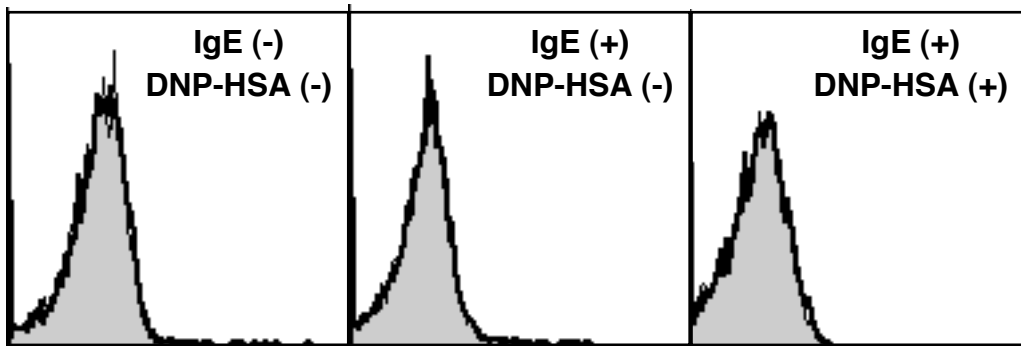

I-A<sup>b</sup> expression on Fc $\epsilon$ RI $\alpha$ <sup>+</sup> c-kit<sup>+</sup> BMCMCs

**B**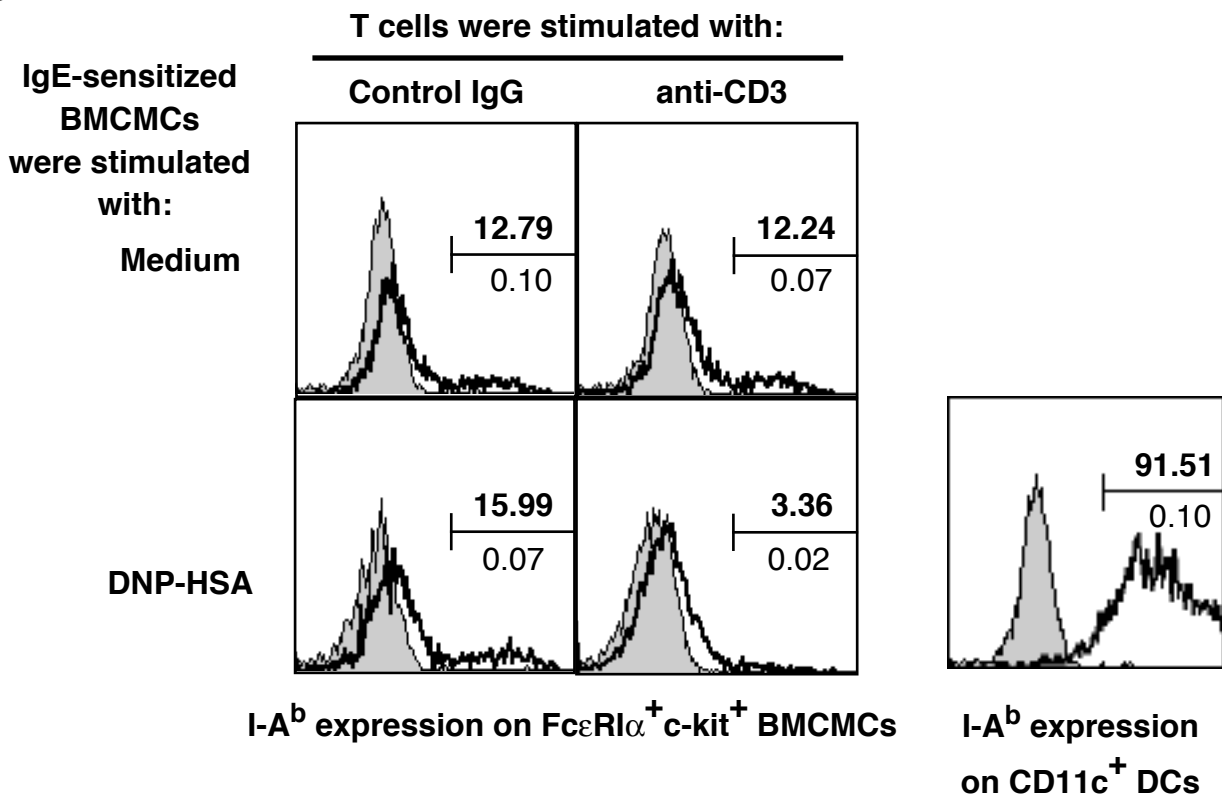

Supplement: pnas_102_18_6467__4.pdf [file pnas_102_18_6467__4.pdf]

**A**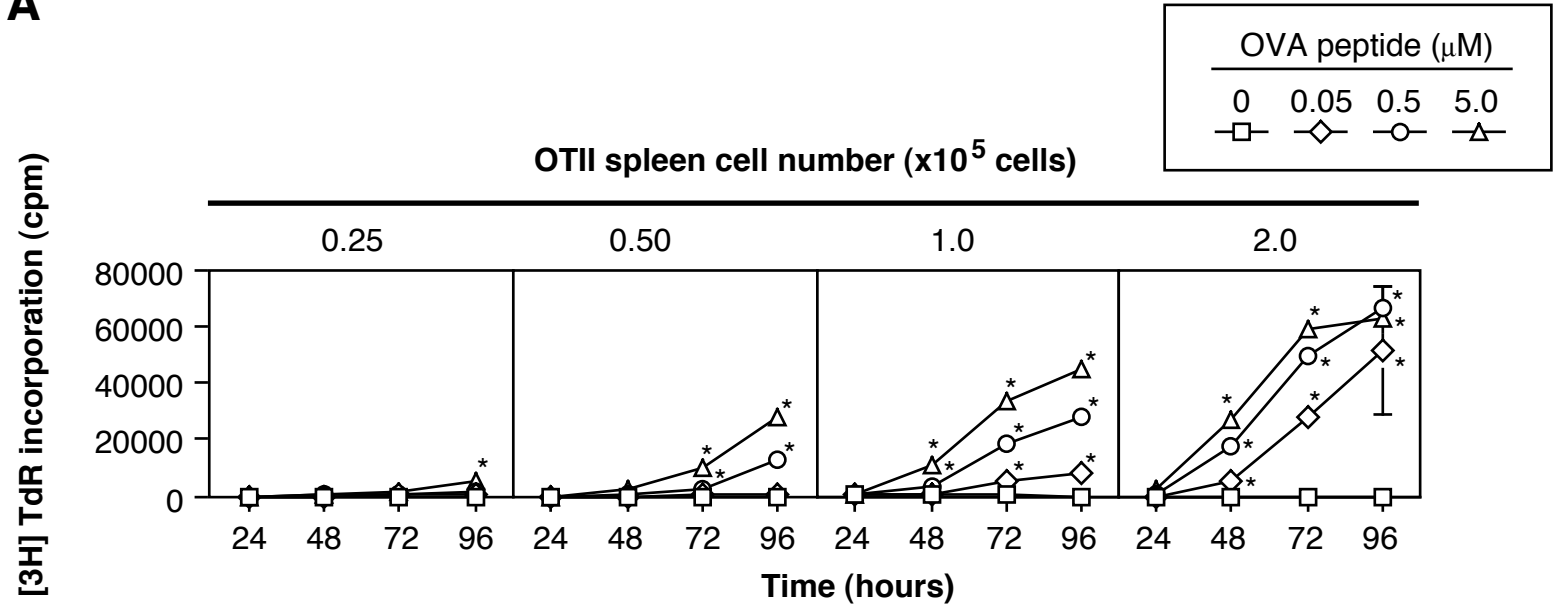**B**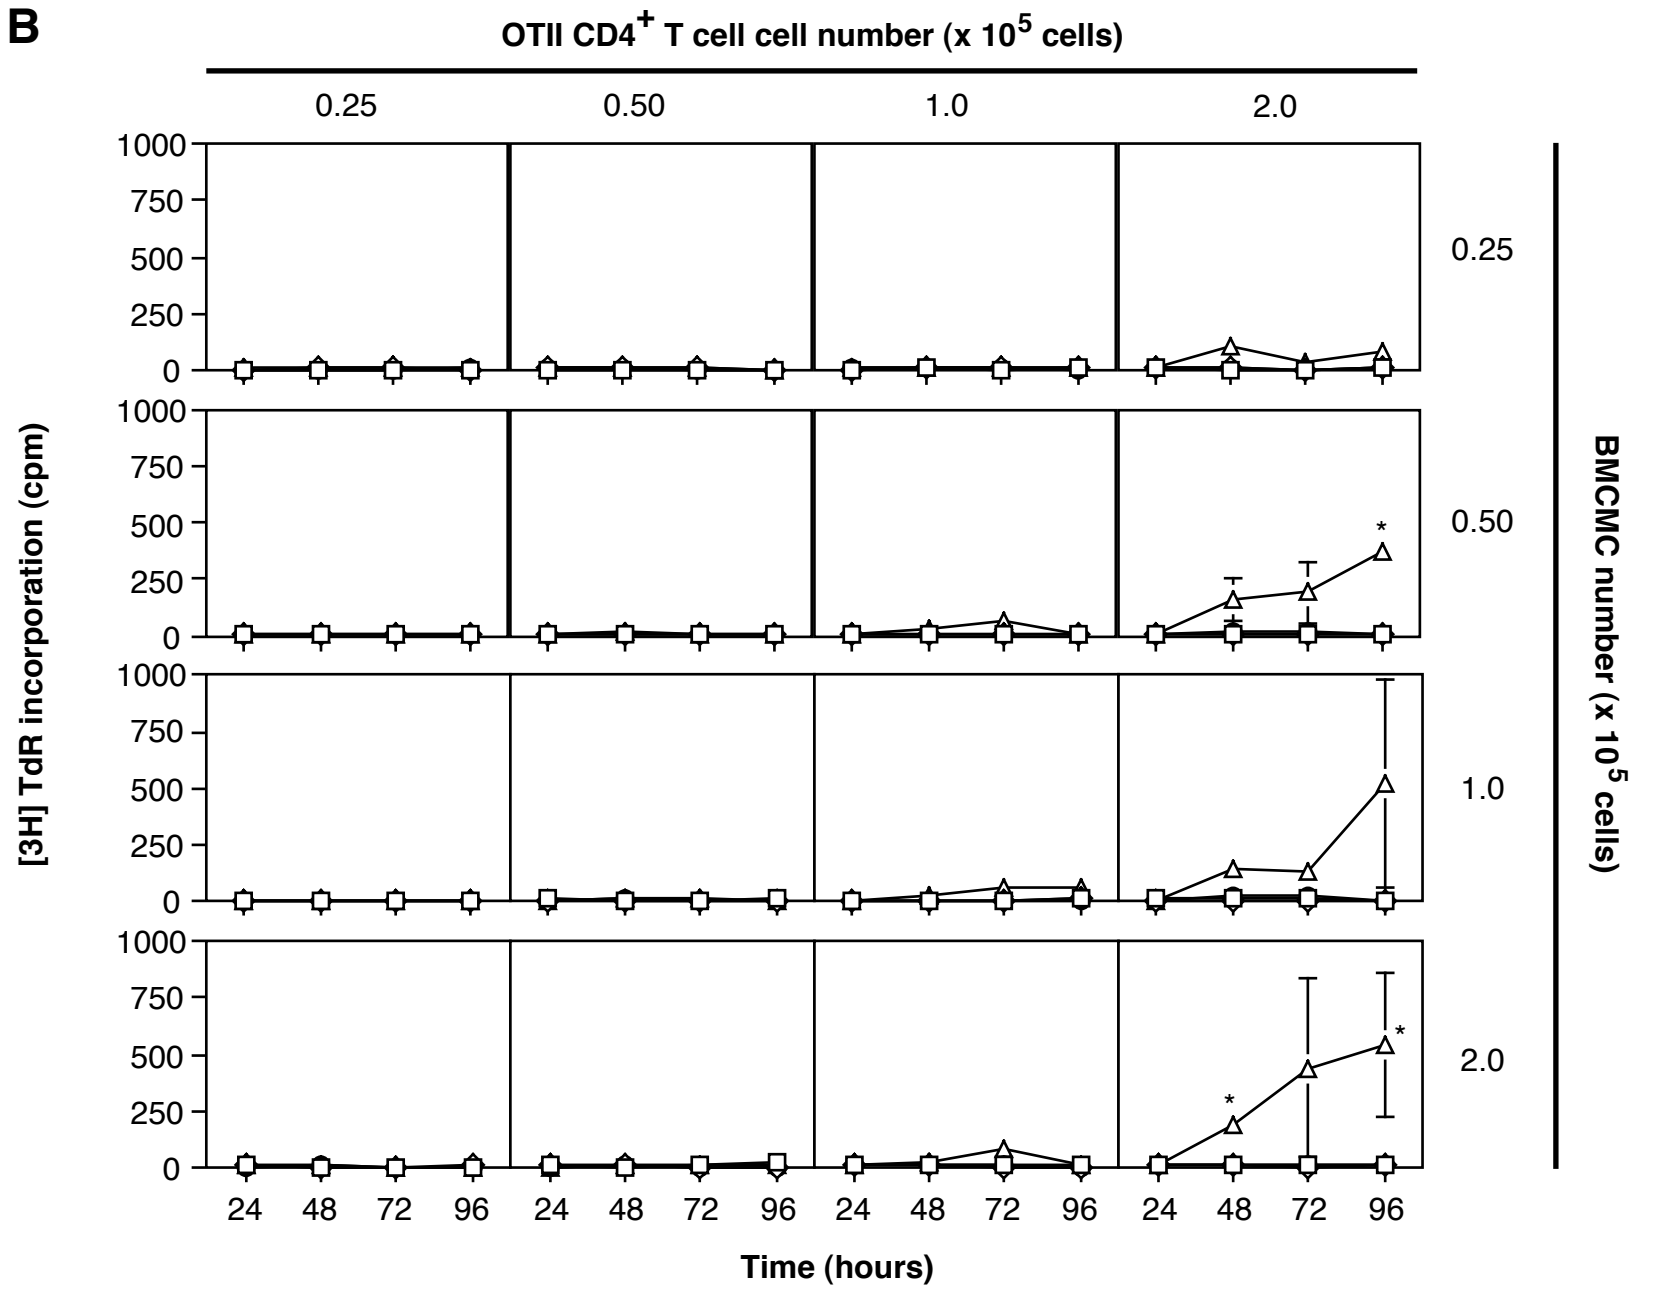

Supplement: pnas_102_18_6467__5.pdf [file pnas_102_18_6467__5.pdf]

**A**

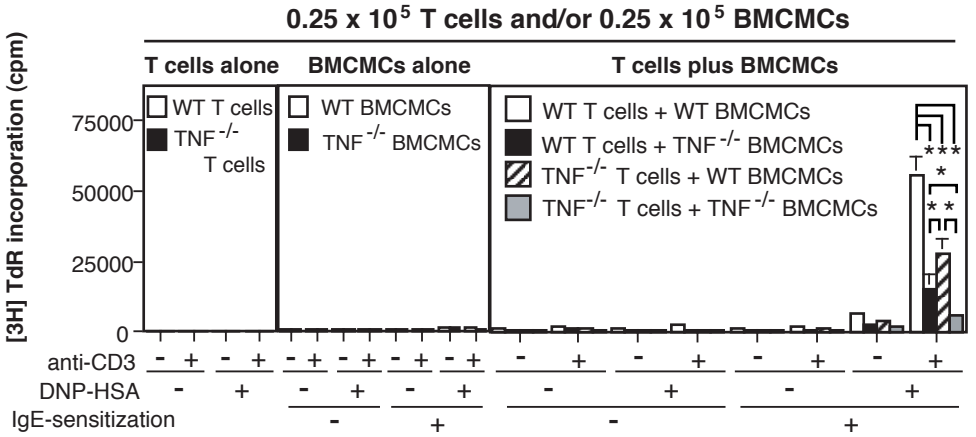

**B**

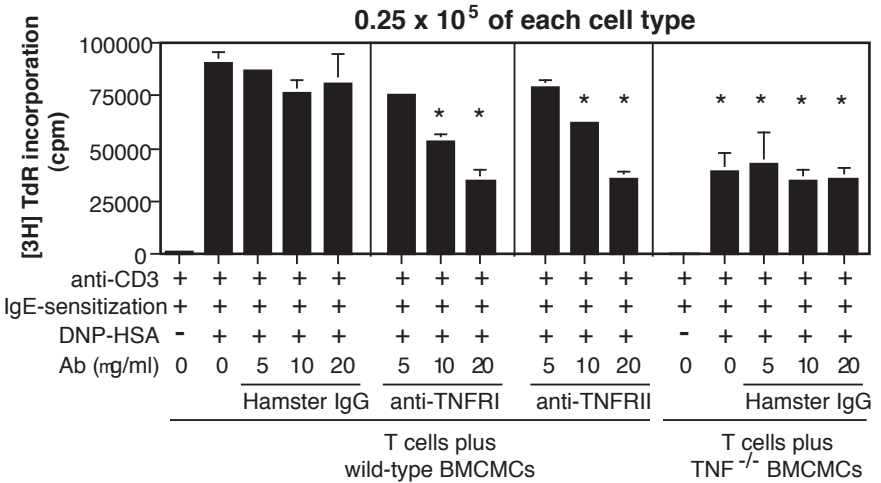

Supplement: pnas_102_18_6467__6.pdf [file pnas_102_18_6467__6.pdf]

**A**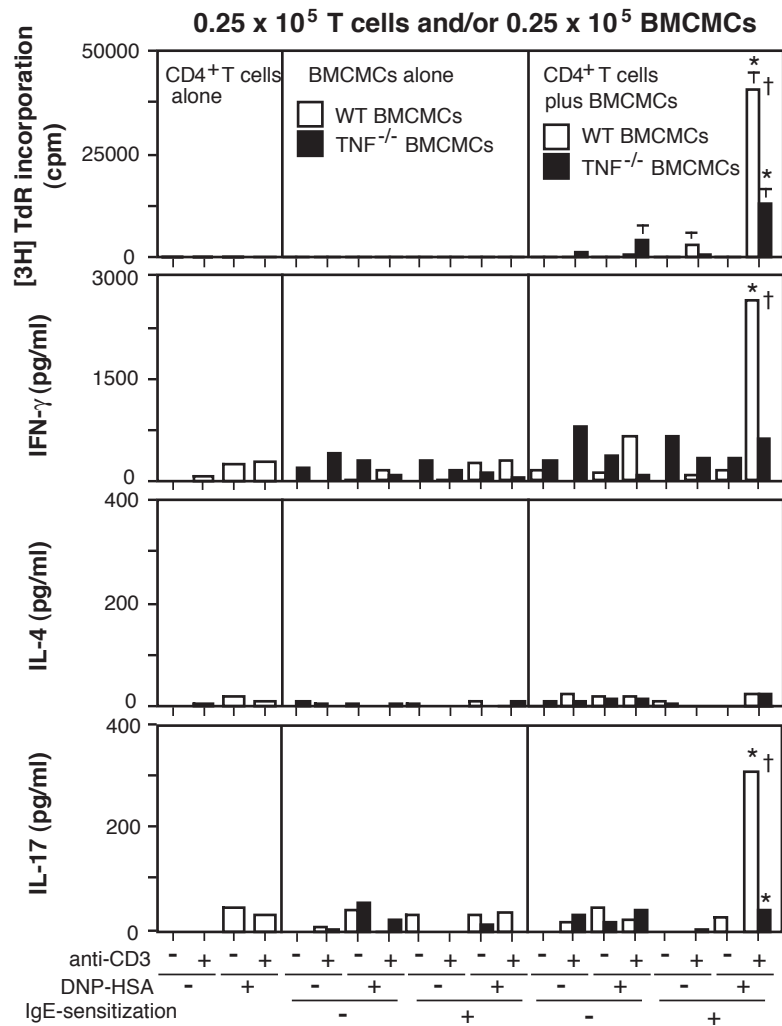**B**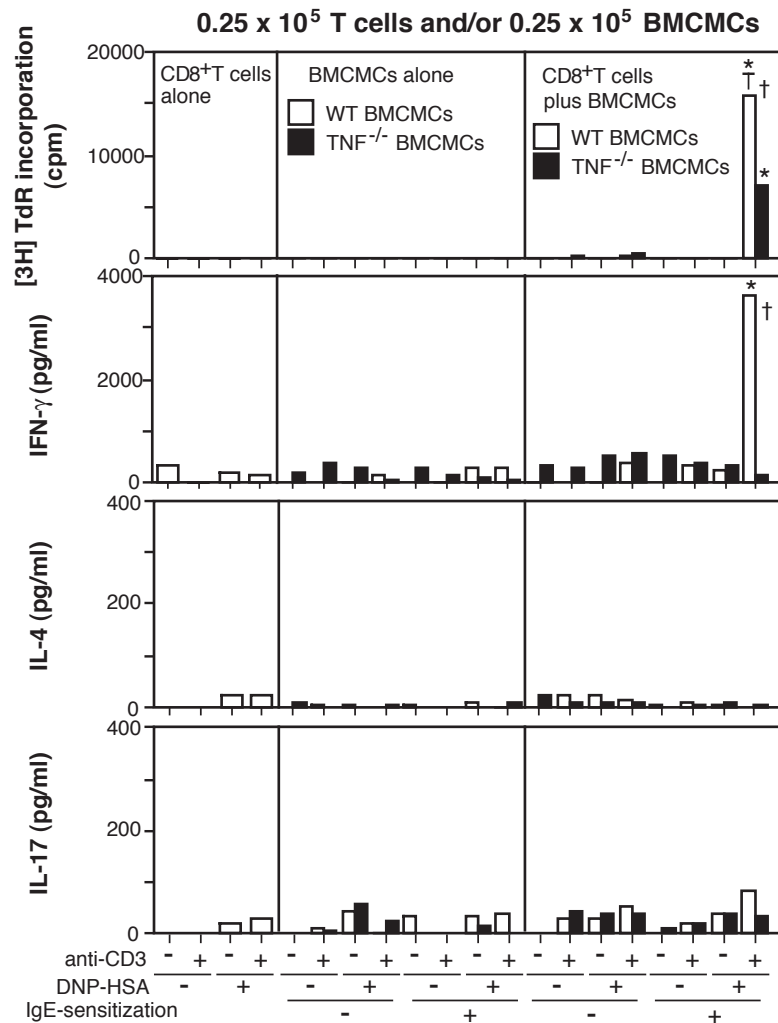

Supplement: pnas_102_18_6467__7.pdf [file pnas_102_18_6467__7.pdf]

**A**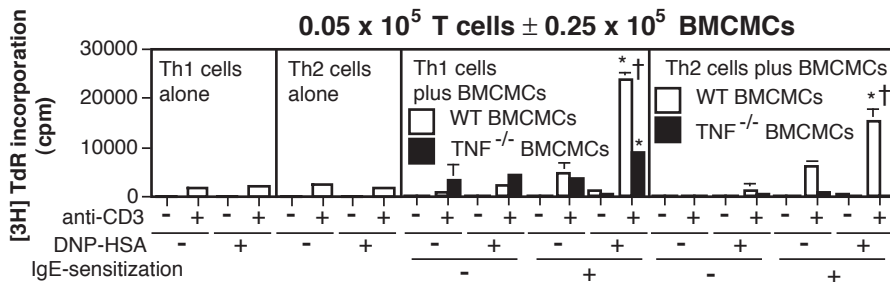**B**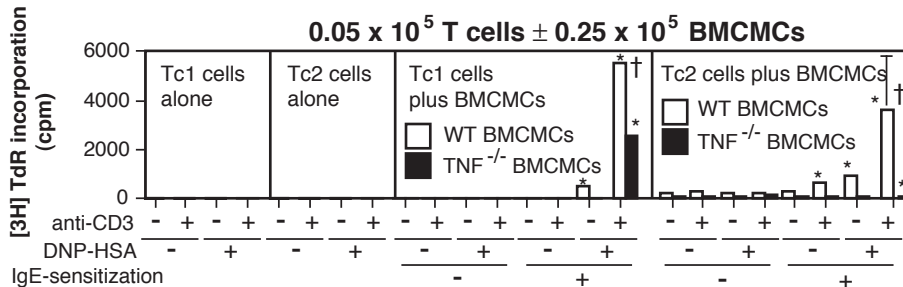**C**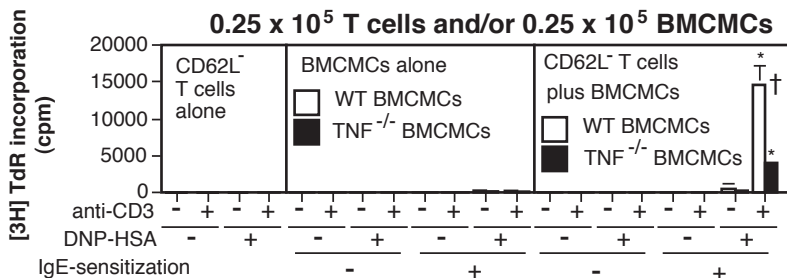**D**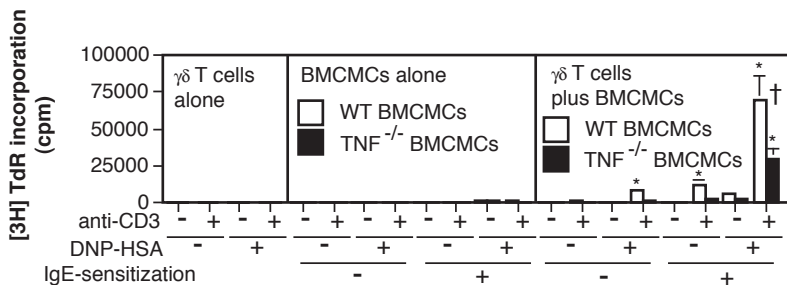

Supplement: pnas_102_18_6467__8.pdf [file pnas_102_18_6467__8.pdf]

**A**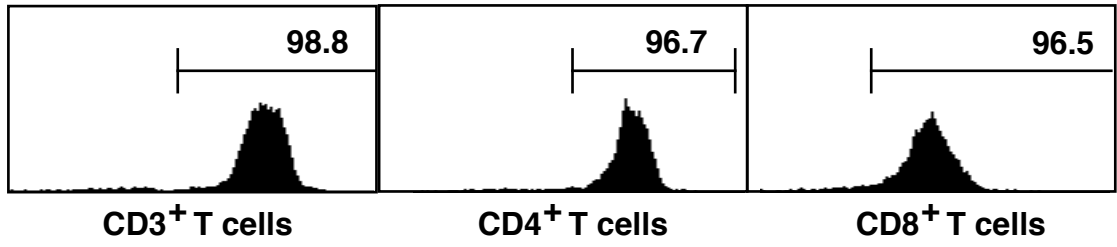**B**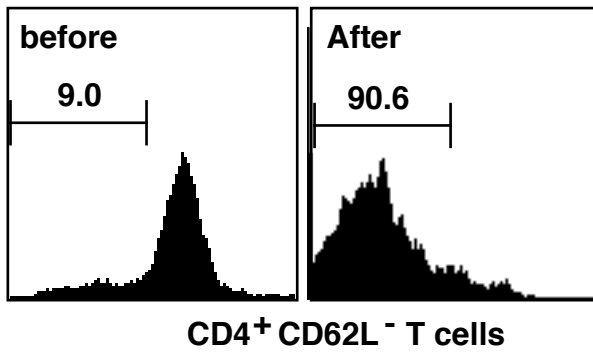**C**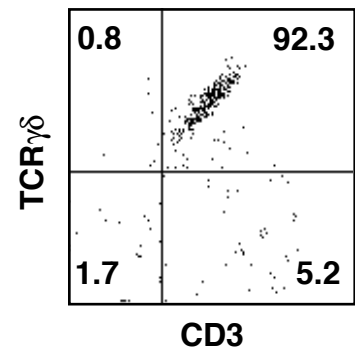**D**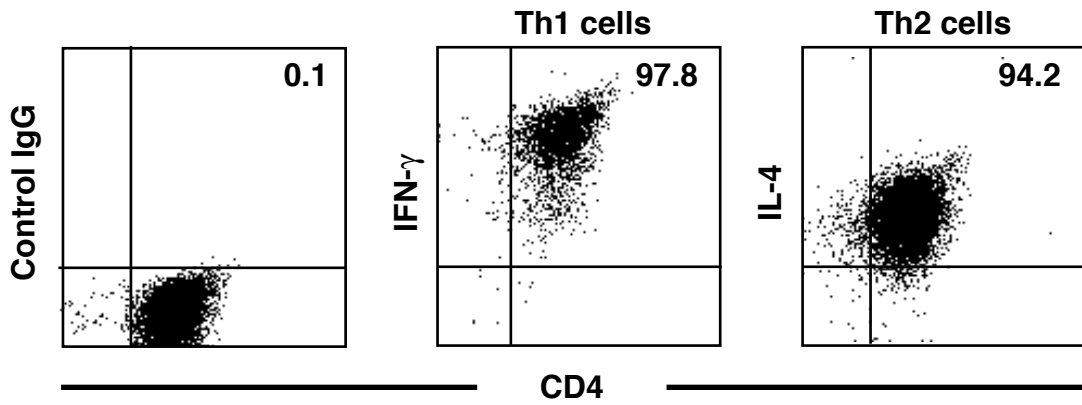**E**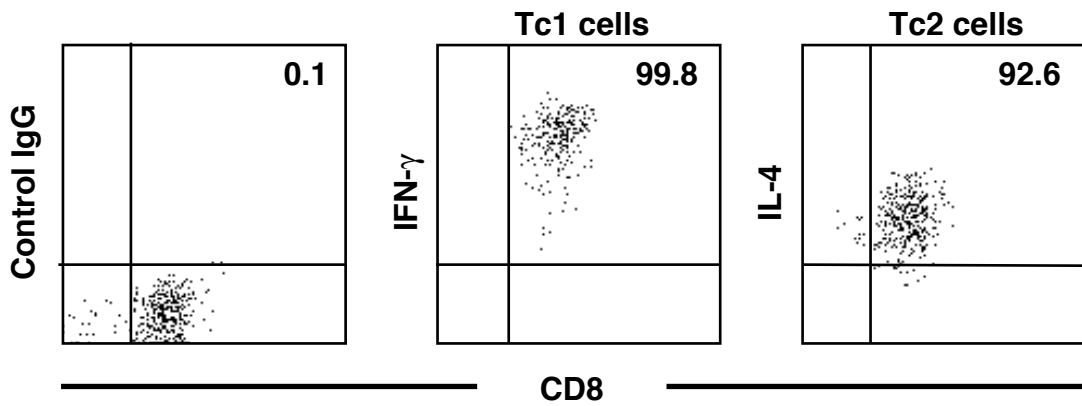

Supplement: pnas_102_18_6467__9.pdf [file pnas_102_18_6467__9.pdf]
